# Supplementary material for: To stir or not to stir: formation of hierarchical superstructures of molecularly ordered ethylene-bridged periodic mesoporous organosilicas
Source: Royal Society of Chemistry journal article supplement (doi:10.1039/b511339c), 2005-11-17

Supplementary material (ESI) for Journal of Materials Chemistry  
This journal is © The Royal Society of Chemistry 2005

## **Supplementary information**

# **To stir or not to stir: Formation of hierarchical superstructures of molecularly ordered ethylene-bridged periodic mesoporous organosilicas**

Yongde Xia, and Robert Mokaya

*School of Chemistry, University of Nottingham, University Park,*

*Nottingham NG7 2RD, U. K.*

**Supporting Figure S1.**

SEM images of ethylene-containing mesoporous organosilica materials obtained under fast stirring conditions showing the presence of sponge-like' particles. The images show that the particles have smooth surfaces.

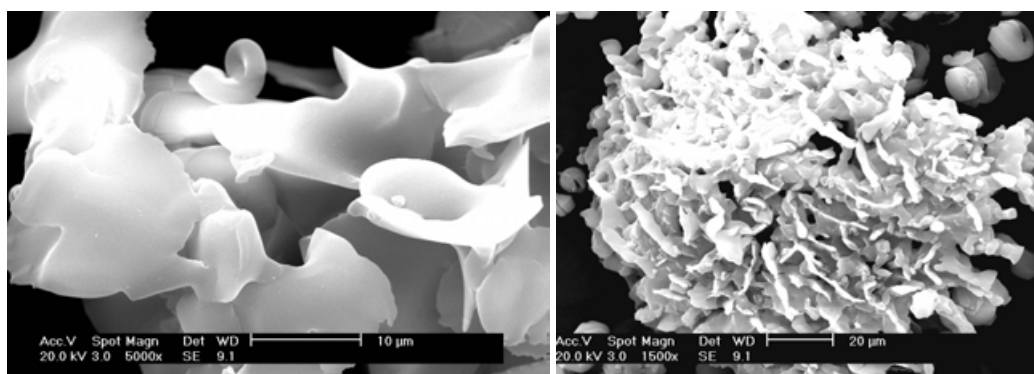

**Supporting Figure S2.**

SEM images of ethylene-containing mesoporous organosilica materials obtained under intermediate stirring conditions showing the presence of a mixture of cake-like and elongated particles.

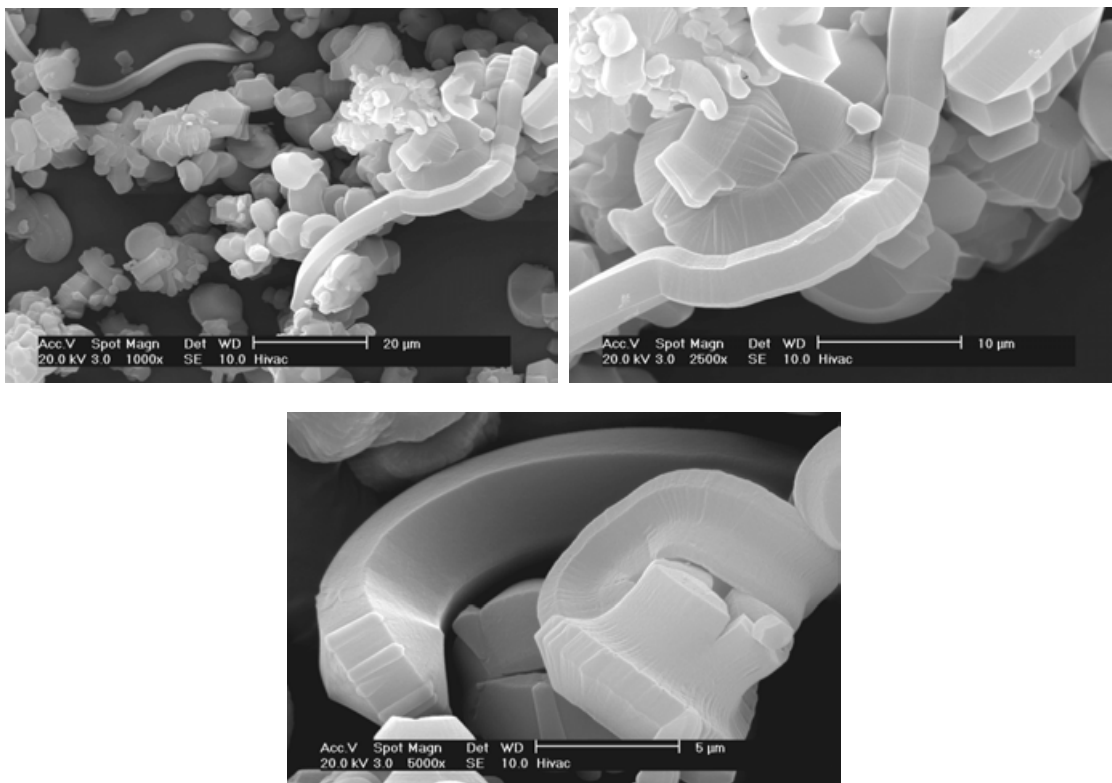

**Supporting Figure S3.**

Representative SEM images of brominated analogues of ethylene-containing mesoporous organosilica materials obtained under static conditions. The particle morphology is not affected by bromination.

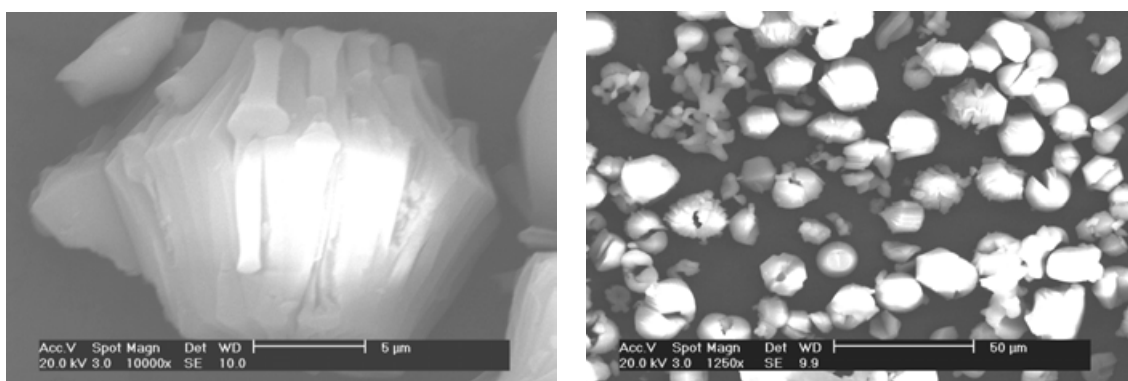

Supplement: b511339c.pdf [file b511339c.pdf]
